# Supplementary material for: Pesticide residues risk assessment and quality evaluation of four characteristic fruits in Zhejiang Province, China
Source: Frontiers journal article supplement (doi:10.3389/fenvs.2023.1124094), 2023-02-22
Supplement: Table_1.DOCX [file Table_1.DOCX]

Table S1 Pesticide detection parameters of four fruits (68 pesticides)

| **Number** | **Pesticides** | **Main effect** | **ADI**  **(mg/kg bw)** |
| --- | --- | --- | --- |
| 1 | Methamidophos | Insecticide | 0.004 |
| 2 | Omethoate | Insecticide | 0.0003 |
| 3 | Parathion | Insecticide | 0.004 |
| 4 | Parathion-methyl | Insecticide | 0.003 |
| 5 | Isofenphos-methyl | Insecticide | 0.003 |
| 6 | Isocarbophos | Insecticide | 0.003 |
| 7 | Dimethoate | Insecticide | 0.002 |
| 8 | Dichlorvos | Insecticide | 0.004 |
| 9 | Chlorpyrifos | Insecticide | 0.01 |
| 10 | Acephate | Insecticide | 0.03 |
| 11 | Triazophos | Insecticide | 0.001 |
| 12 | Profenofos | Insecticide | 0.03 |
| 13 | Fenitrothion | Insecticide | 0.006 |
| 14 | Diazinon | Insecticide | 0.005 |
| 15 | Malathion | Insecticide | 0.3 |
| 16 | Phosmet | Insecticide | 0.01 |
| 17 | Phosalone | Insecticide | 0.02 |
| 18 | HCH | Insecticide | 0.005 |
| 19 | Cypermethrin | Insecticide | 0.02 |
| 20 | Fenvalerate | Insecticide | 0.02 |
| 21 | Fenpropathrin | Insecticide | 0.03 |
| 22 | Cyhalothrin | Insecticide | 0.02 |
| 23 | Cyfluthrin | Insecticide | 0.04 |
| 24 | Deltamethrin | Insecticide | 0.01 |
| 25 | Bifenthrin | Insecticide/Acaricide | 0.01 |
| 26 | Tau-fluvalinate | Insecticide | 0.003 |
| 27 | Flucythrinate | Insecticide | 0.02 |
| 28 | Triadimefon | fungicide | 0.03 |
| 29 | Iprodione | fungicide | 0.06 |
| 30 | Dicofol | Acaricide | 0.002 |
| 31 | Procymidone | fungicide | 0.1 |
| 32 | Quintozene | fungicide | 0.01 |
| 33 | Vinclozolin | fungicide | 0.01 |
| 34 | Pendimethalin | herbicide | 0.1 |
| 35 | permethrin | Insecticide | 0.05 |
| 36 | Chlorothalonil | fungicide | 0.02 |
| 37 | Chlorfenapyr | Insecticide | 0.03 |
| 38 | Phoxim | Insecticide | 0.004 |
| 39 | Methomyl | Insecticide | 0.02 |
| 40 | Carbofuran | Insecticide | 0.001 |
| 41 | Carbaryl | Insecticide | 0.008 |
| 42 | Acetamiprid | Insecticide | 0.07 |
| 43 | Pyridaben | Acaricide | 0.01 |
| 44 | Pyrimethanil | fungicide | 0.2 |
| 45 | Chlorbenzuron | Insecticide | 1.25 |
| 46 | Carbendazim | fungicide | 0.03 |
| 47 | Imidacloprid | Insecticide | 0.06 |
| 48 | Emamectin benzoate | Insecticide | 0.0005 |
| 49 | Dimethomorph | fungicide | 0.2 |
| 50 | Thiamethoxam | Insecticide | 0.08 |
| 51 | Chlorfluazuron | Insecticide | 0.005 |
| 52 | Prochloraz | fungicide | 0.01 |
| 53 | Azoxystrobin | fungicide | 0.2 |
| 54 | Metalaxy | fungicide | 0.08 |
| 55 | Propamocarb | fungicide | 0.4 |
| 56 | Cyromazine | Insecticide | 0.06 |
| 57 | Paclobutrazol | Plant growth regulator | 0.1 |
| 58 | Tebufenozide | Insecticide | 0.02 |
| 59 | Pyraclostrobin | fungicide | 0.03 |
| 60 | Phorate | Insecticide | 0.0007 |
| 61 | Aldicarb | Insecticide | 0.003 |
| 62 | Fipronil | Insecticide | 0.0002 |
| 63 | Difenoconazole | fungicide | 0.01 |
| 64 | Forchlorfenuron | Plant growth regulator | 0.07 |
| 65 | Chlorantraniliprole | Insecticide | 2 |
| 66 | Etofenprox | Insecticide | 0.03 |
| 67 | Abamectin | Insecticide | 0.001 |
| 68 | Diflubenzuron | Insecticide | 0.02 |

*Note.* ADI is the acceptable daily intake (mg/kg bw). The ADIs of pesticides were used according to the National Food Safety Standard-MRLs for Pesticides in Food (Ministry of Agriculture and Rural Affairs of the People's Republic of China, 2021).

Table S2 Pesticidemaximum residue limits (MRLs) for various countries/regions

| Fruits | Pesticides | MRLs (mg/kg) | | | |
| --- | --- | --- | --- | --- | --- |
| China | EU | Japan | CAC |
| Yellow peach | Difenoconazole | 0.5 | 0.5 | 1 | 0.5 |
| Acetamiprid | 2 | 0.2 | 2 | 0.7 |
|  | Pyrimethanil | 4 | 10 | 10 | 4 |
|  | Chlorbenzuron | 2 | — | — | — |
|  | Carbendazim | 2 | 0.2 | 2 | 2 |
|  | Imidacloprid | 0.5 | 0.01* | 0.5 | — |
|  | Emamectin benzoate | 0.03 | 0.15 | 0.1 | 0.03 |
|  | Chlorfluazuron | — | — | 0.05 | — |
|  | Chlorfenapyr | — | 0.01* | 0.05 | — |
|  | Paclobutrazol | — | 0.15 | 0.2 | — |
|  | Pyraclostrobin | 1 | 0.3 | 0.02 | — |
|  | Chlorothalonil | 0.2 | 0.01* | 2 | — |
|  | Chlorantraniliprole | 2* | 1 | 0.4 | — |
|  | Cypermethrin | 1 | 2 | 5 | — |
|  | Deltamethrin | 0.05 | 0.15 | 0.5 | 0.05 |
|  | Cyfluthrin | 0.5 | 0.3 | 1 | — |
| loquat | Cyhalothrin | 0.2 | 0.2 | 0.4 | — |
|  | Imidacloprid | — | 0.01* | 0.5 | — |
|  | Thiamethoxam | 0.3 | 0.3 | 0.2 | — |
|  | Difenoconazole | 0.5 | 0.8 | 1 | — |
|  | Pyrimethanil | 7 | 15 | 0.05 | — |
|  | Carbendazim | 3 | 2 | 3 | — |
|  | Pyraclostrobin | 3 | 0.5 | 2 | — |
|  | Acetamiprid | 2 | 0.8 | 2 | — |
|  | Cypermethrin | 0.7 | 1 | 2 | — |
| sweet orange tangle | Cypermethrin | 0.3 | 2 | 2 | 0.3 |
| Acetamiprid | 2 | 0.9 | 2 | 1 |
| Pyridaben | 2 | 0.3 | 1 | — |
|  | Carbendazim | 5 | — | 3 | — |
|  | Prochloraz | 10 | 0.03* | — | 10 |
|  | Pyraclostrobin | 2 | 2 | 2 | 2 |
|  | Difenoconazole | 0.6 | 0.6 | 0.6 | 0.6 |
|  | Fenpropathrin | 5 | 2 | 3 | 2 |
|  | Imidacloprid | 1 | 0.9 | 0.7 | 1 |
|  | Dichlorvos | 0.2 | 0.01* | 0.2 | — |
| pear | Fenvalerate | 1 | 0.1 | 2 | — |
|  | Cyhalothrin | 0.2 | 0.08 | 0.4 | — |
|  | Deltamethrin | 0.1 | 0.1 | 0.3 | — |
|  | Bifenthrin | 0.5 | 0.01* | 0.5 | — |
|  | Difenoconazole | 0.5 | 0.8 | 0.8 | — |
|  | Chlorfenapyr | 1 | 0.01* | 1 | — |
|  | Acetamiprid | 2 | 0.4 | 2 | — |
|  | Chlorbenzuron | — | — | — | — |
|  | Carbendazim | 3 | 0.2 | 3 | — |
|  | Emamectin benzoate | 0.02 | 0.02 | — | — |
|  | Thiamethoxam | 0.3 | 0.3 | 1 | — |
|  | Prochloraz | 0.2 | 0.03* | _ | — |
|  | Paclobutrazol | — | 0.05 | 1 | — |
|  | Pyraclostrobin | 0.5 | 0.5 | 0.7 | — |
|  | Chlorantraniliprole | 0.4* | 0.5 | 1 | — |
|  | Abamectin | 0.02 | 0.03 | 0.02 | — |

∗: temporary limit
